# Supplementary material for: Claudin-18–mediated YAP activity regulates lung stem and progenitor cell homeostasis and tumorigenesis
Source: JCI journal article supplement (doi:10.1172/jci90429), 2018-02-04

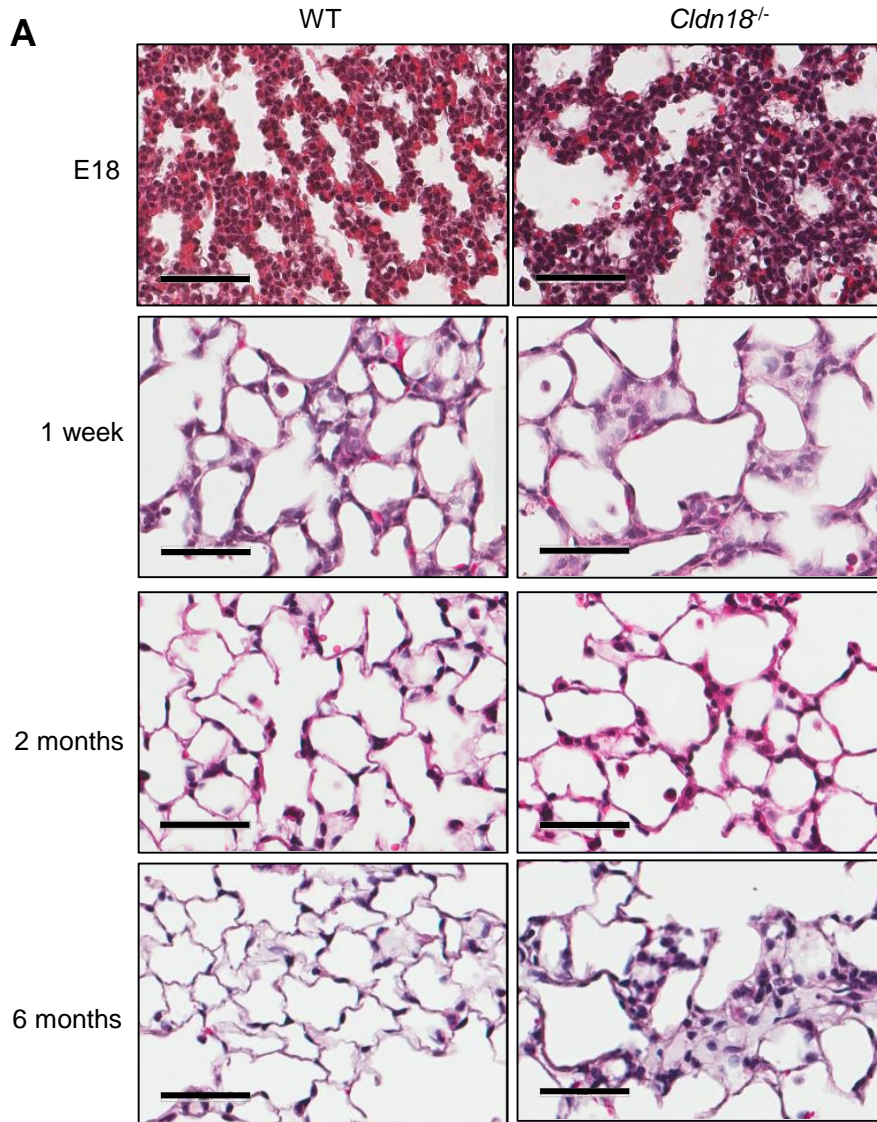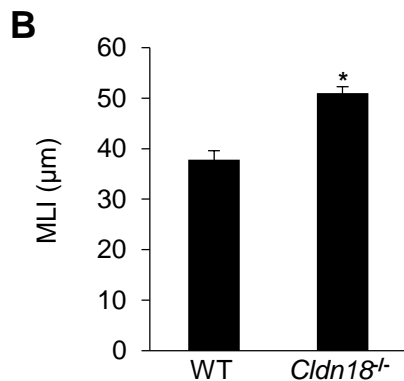

**Supplemental Figure 1. Increased cellularity and mean linear intercept in lungs of *Cldn18*<sup>-/-</sup> mice. (A)** Hematoxylin and eosin staining of whole lung sections from WT and *Cldn18*<sup>-/-</sup> mice at E18, 1 week and 2 and 6 months shows increased cellularity and enlarged alveolar airspaces. Scale bar: 50 μm. **(B)** Increased mean linear intercept (MLI) in lungs of *Cldn18*<sup>-/-</sup> mice (WT 37.8 ± 1.8 μm and *Cldn18*<sup>-/-</sup> 51.0 ± 1.3 μm) at 1 month of age. n = 4. Unpaired 2-tailed t-test. \*, *P* < 0.05. Bar graphs represent mean ± SEM for **B**.

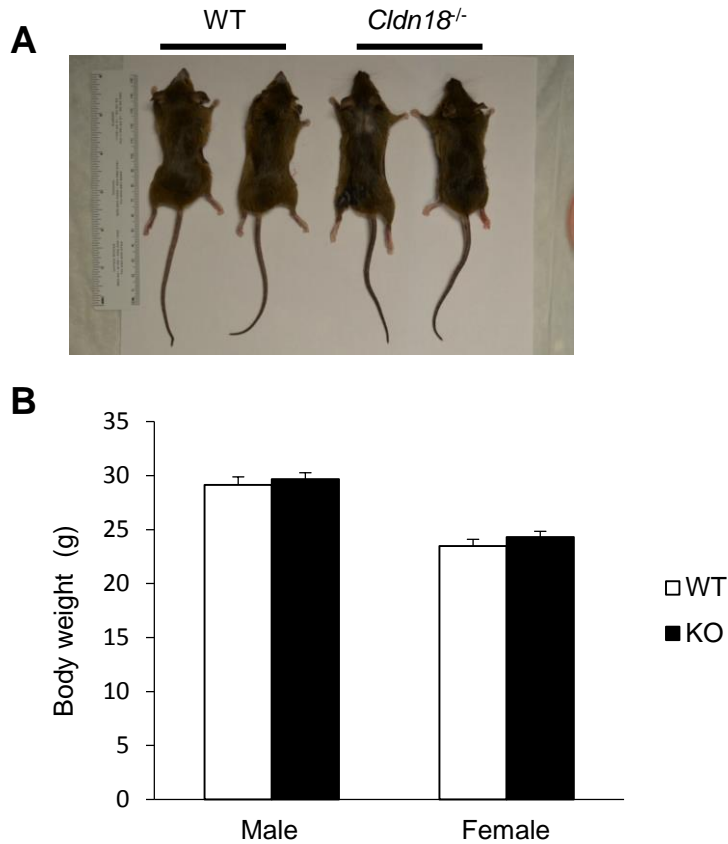

**Supplemental Figure 2. Unchanged size and body weight of *Cldn18<sup>-/-</sup>* mice. (A)** WT and *Cldn18<sup>-/-</sup>* mice are of similar size at age 7 months. **(B)** Weight of WT (29.1 ± 0.7 g (male) and 23.5 ± 0.6 g (female)) and *Cldn18<sup>-/-</sup>* (29.7 ± 0.6 g (male) and 24.3 ± 0.5 g (female)) mice is similar at ~7 months of age. n ≥ 6. Two-way ANOVA with Bonferroni's correction. Bar graphs represent mean ± SEM for **B**.

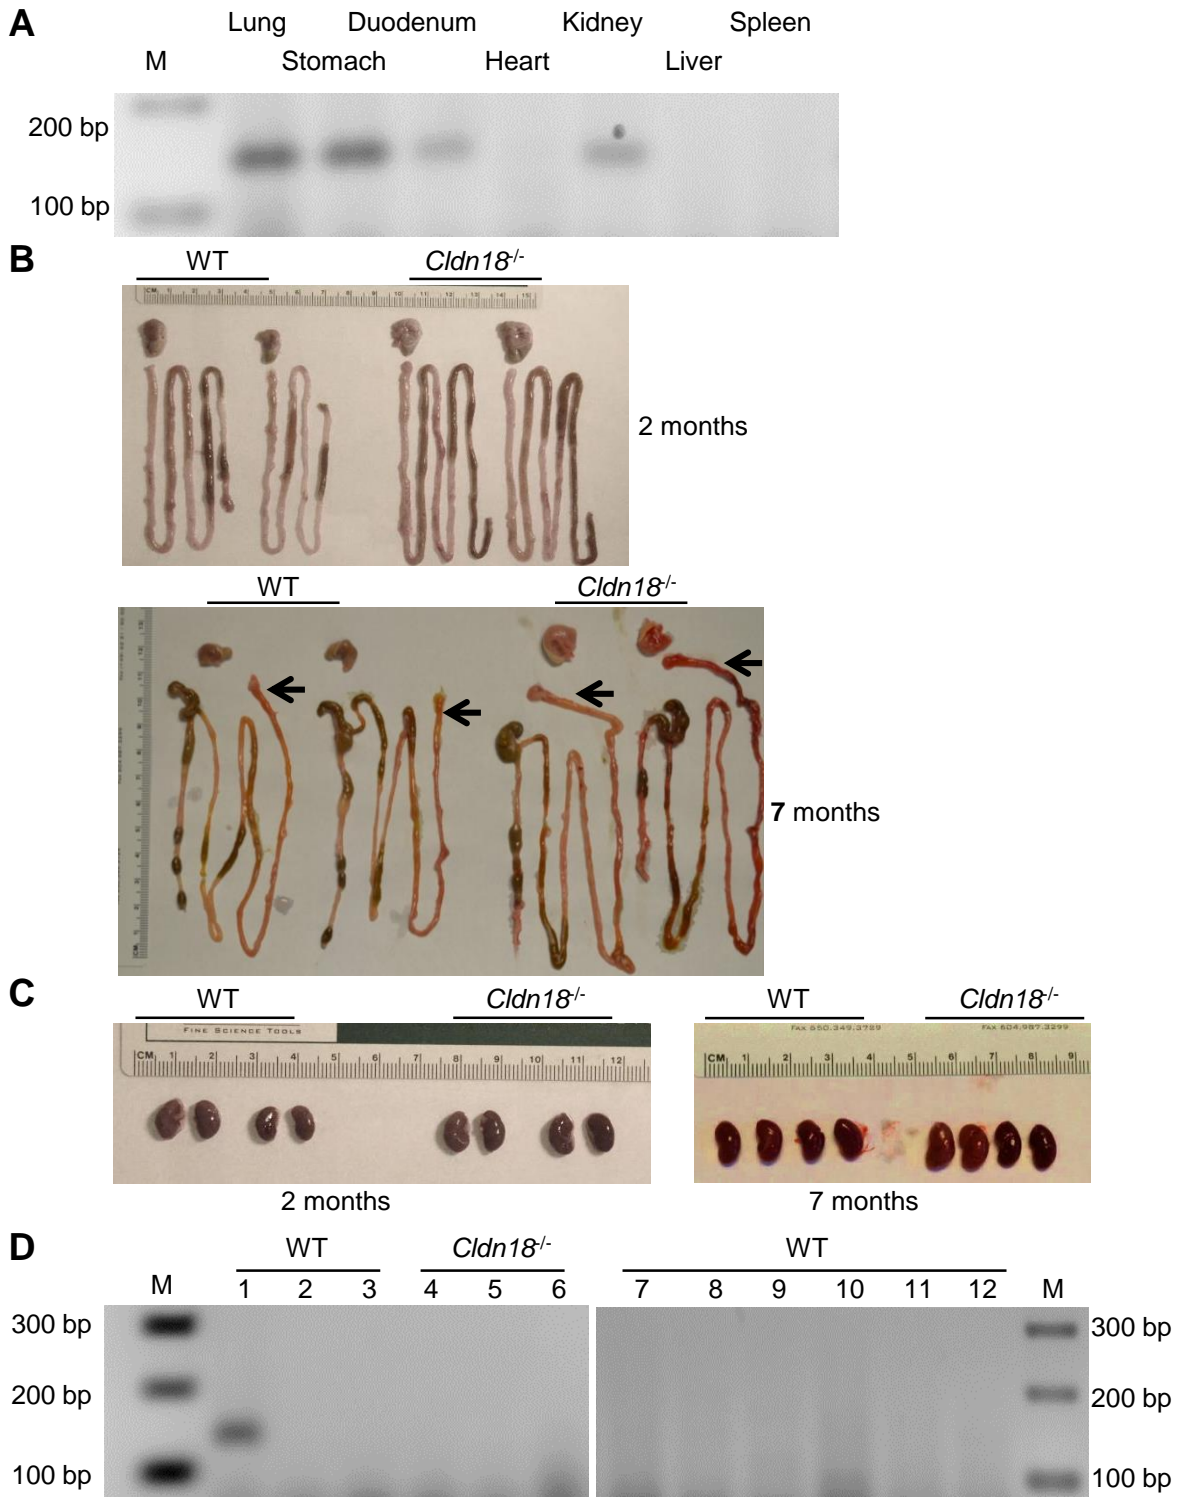

**Supplemental Figure 3. Expression of *Cldn18* in different organs.** (A) RT-PCR shows that lung, stomach, duodenum and kidney express *Cldn18* while other organs (heart, liver and spleen) do not. Stomach (B) and kidney (C) of *Cldn18*<sup>-/-</sup> mice at age 2 and 7 months are visibly larger than those of WT mice. Duodenum (B) of *Cldn18*<sup>-/-</sup> mice is visibly larger than that of WT mice at age 7 months (arrow). (D) RT-PCR shows that trachea, esophagus, brain, intestine, colon, uterus and muscle do not express *Cldn18*, and *Cldn18* is expressed in WT but not *Cldn18*<sup>-/-</sup> lung (1 and 4: lung; 2 and 5: trachea; 3 and 6: esophagus; 7: brain; 8: trachea; 9: intestine; 10: colon; 11: uterus; 12: muscle; M: marker).

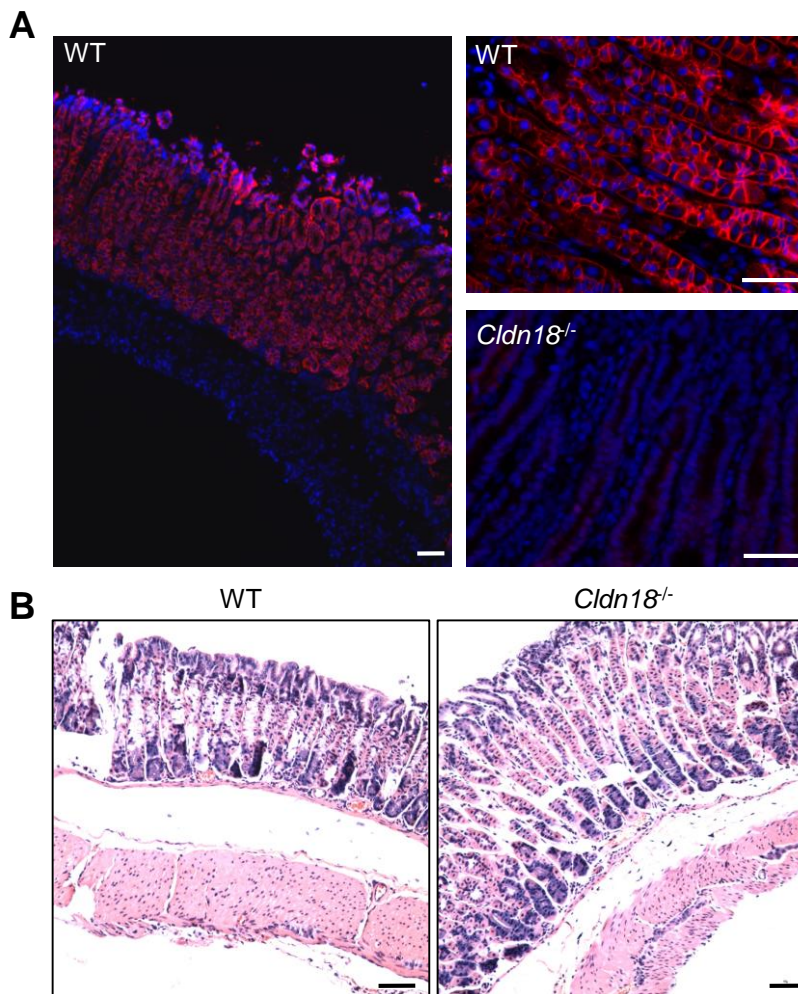

**Supplemental Figure 4. Increased gastric mucosal thickness and expansion of proliferative zone in *Cldn18<sup>-/-</sup>* mice. (A)** Immunofluorescence shows CLDN18 (red) expression in stomach of WT but not *Cldn18<sup>-/-</sup>* mice. DAPI (blue) is the nuclear counterstain. Scale bar: 50  $\mu$ m. **(B)** Hematoxylin and eosin staining shows increased gastric mucosal thickness in *Cldn18<sup>-/-</sup>* compared to WT mice. Scale bar: 50  $\mu$ m.

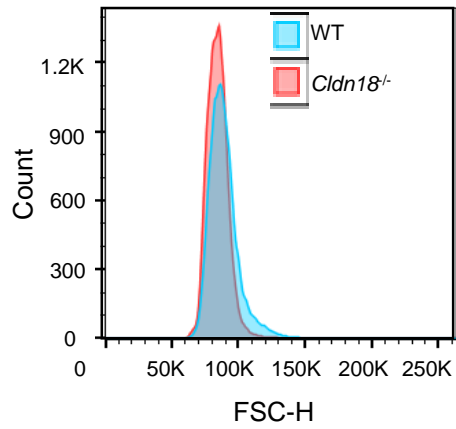

**Supplemental Figure 5. Unchanged type II (AT2) cell size in *Cldn18*<sup>-/-</sup> lungs.** Representative flow cytometric analysis reveals no difference in cell size between WT and *Cldn18*<sup>-/-</sup> AT2 cells. n = 3.



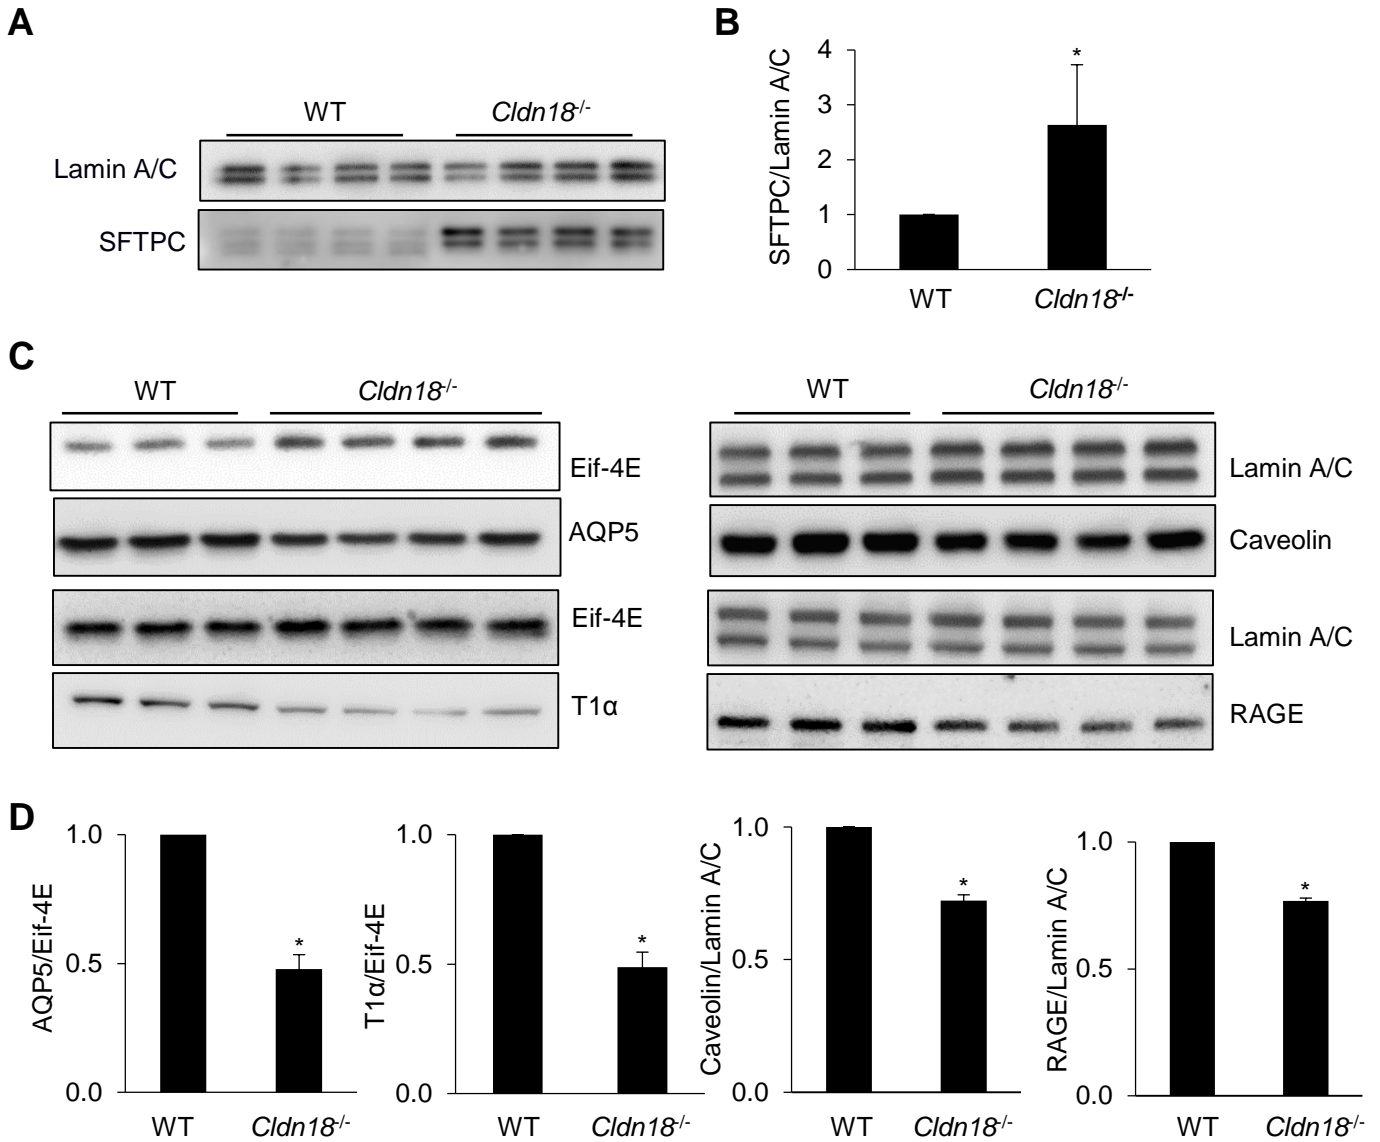

**Supplemental Figure 6. Increased expression of type II (AT2) and decreased expression of type I (AT1) cell markers in lung of *Cldn18*<sup>-/-</sup> mice.** (A, B) Whole lung lysates show significantly higher levels of SFTPC in *Cldn18*<sup>-/-</sup> compared to WT mice.  $n = 4$ . Z-test. \*,  $P < 0.05$ . Western analysis (C) and quantification (D) in whole lung lysates show significantly decreased expression of AQP5, T1 $\alpha$ , caveolin-1 and RAGE in *Cldn18*<sup>-/-</sup> compared to WT mice.  $n \geq 3$ . Z-test. \*,  $P < 0.05$ . Bar graphs represent mean  $\pm$  SEM for B and D.

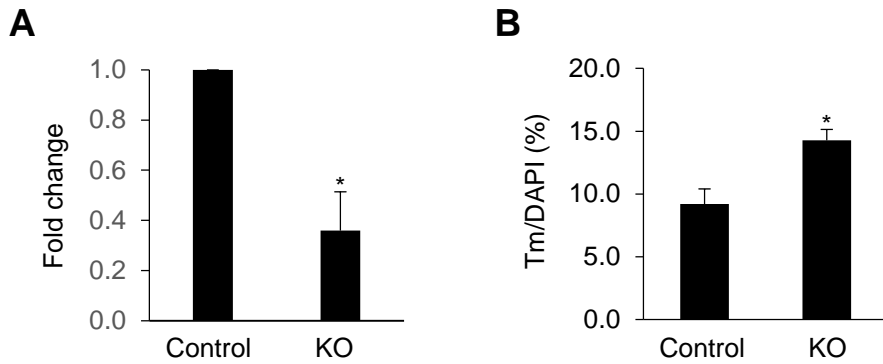

**Supplemental Figure 7. Increased type II (AT2) cell number in AT2 cell-specific *Cldn18* KO mice.** (A) *Cldn18* mRNA is decreased in isolated AT2 cells one week after administration of tamoxifen (Tmx) intraperitoneally for 2 days at a dose of 100 mg/kg to *Sftpc*<sup>+/*creERT2*</sup>;*C18*<sup>F/F</sup>;*ROSA*<sup>+/*Tm*</sup> mice (KO) compared to *Sftpc*<sup>+/*creERT2*</sup>;*ROSA*<sup>+/*Tm*</sup> mice (control). n = 3. Z-test. \*, *P* <0.05. (B). Tomato<sup>+</sup> (Tm<sup>+</sup>) AT2 cells are increased in *Sftpc*<sup>+/*creERT2*</sup>;*C18*<sup>F/F</sup>;*ROSA*<sup>+/*Tm*</sup> compared to *Sftpc*<sup>+/*creERT2*</sup>;*ROSA*<sup>+/*Tm*</sup> mice ~ 5 months following Tmx injection at the age of 1-2 months. n = 5. Z-test. \*, *P* <0.05. Bar graphs represent mean ± SEM for **A** and **B**.

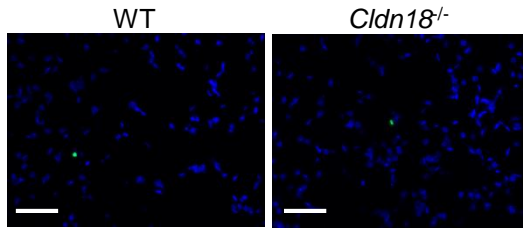

**Supplemental Figure 8. Apoptosis in lungs of *Cldn18*<sup>-/-</sup> mice.** Representative TUNEL assay shows similarly low numbers of apoptotic cells (green) in distal lung of WT and *Cldn18*<sup>-/-</sup> mice. n=3 mice for each genotype. Scale bar: 50  $\mu$ m.



**A**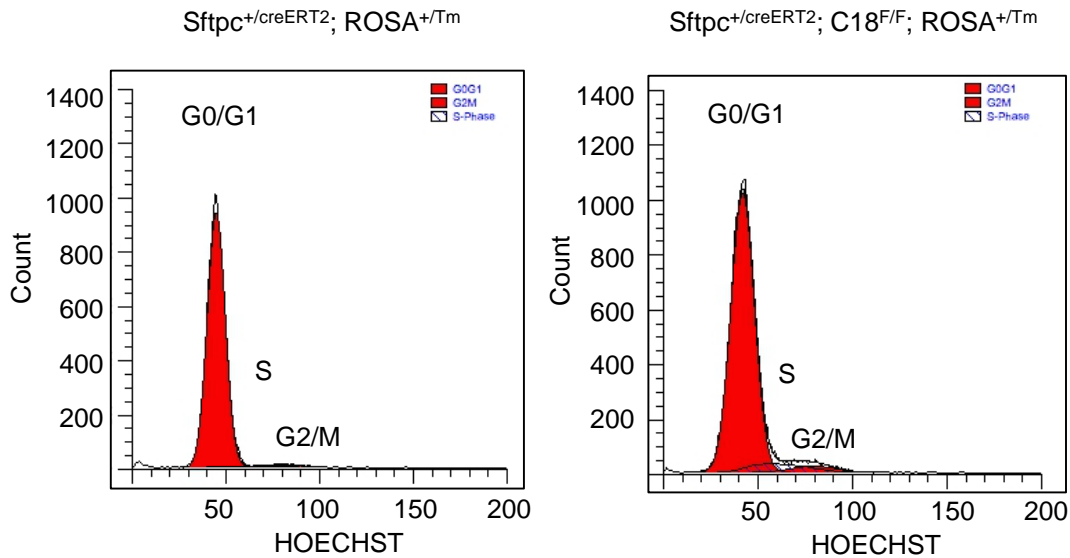**B**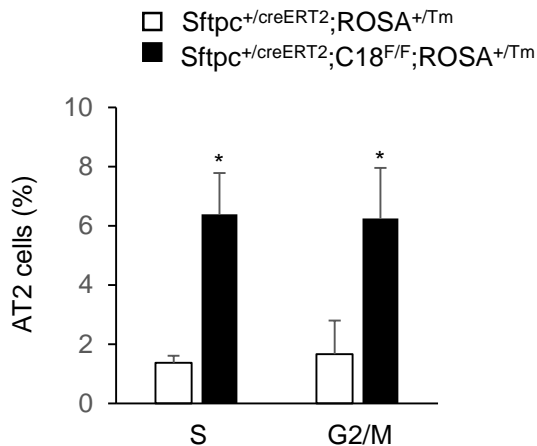

**Supplemental Figure 9. Increased type II (AT2) cell proliferation in AT2 cell-specific *Cldn18* KO mice.** Representative flow cytometry (A) and quantitation (B) show a greater percentage of AT2 cells in S and G2/M phase in *Sftpc*<sup>+/creERT2</sup>; *C18F/F*; *ROSA*<sup>+/Tm</sup> compared to control *Sftpc*<sup>+/creERT2</sup>; *ROSA*<sup>+/Tm</sup> mice (1-5 months following Tmx injection at the age of 3-4 months). *n* = 4 mice of each genotype. Two-way ANOVA. \*, vs. control mice, *P* < 0.05. Bar graphs represent mean ± SEM for B.

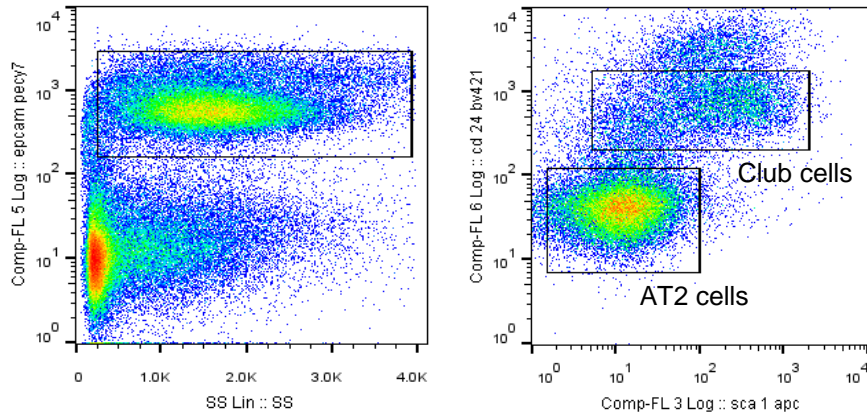

**Supplemental Figure 10. Fluorescence activated cell sorting of type II (AT2) cells from WT mice.** AT2 cells (EpCAM<sup>Hi</sup>/CD45<sup>-</sup>CD34<sup>-</sup>CD31<sup>-</sup>CD24<sup>-</sup>SCA1<sup>-</sup>) were sorted from WT mouse lungs. Gates are shown for AT2 and club cells.

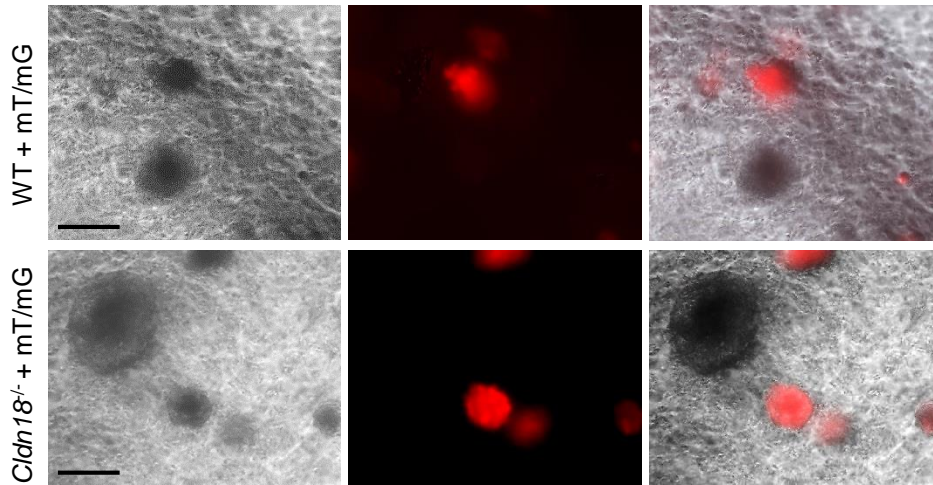

**Supplemental Figure 11. Mixed 3D cultures of mT/mG (Tomato<sup>+</sup>) and unlabeled WT or *Cldn18*<sup>-/-</sup> cells.** Single sorted type II (AT2) cells from mT/mG mice and either WT or *Cldn18*<sup>-/-</sup> mice were co-cultured with MLg fibroblasts in 3D Matrigel. Mixed cultures consisting of mT/mG and either WT or *Cldn18*<sup>-/-</sup> cells formed colonies with either labeled or unlabeled cells, indicating clonality. Scale bar: 50  $\mu$ m.

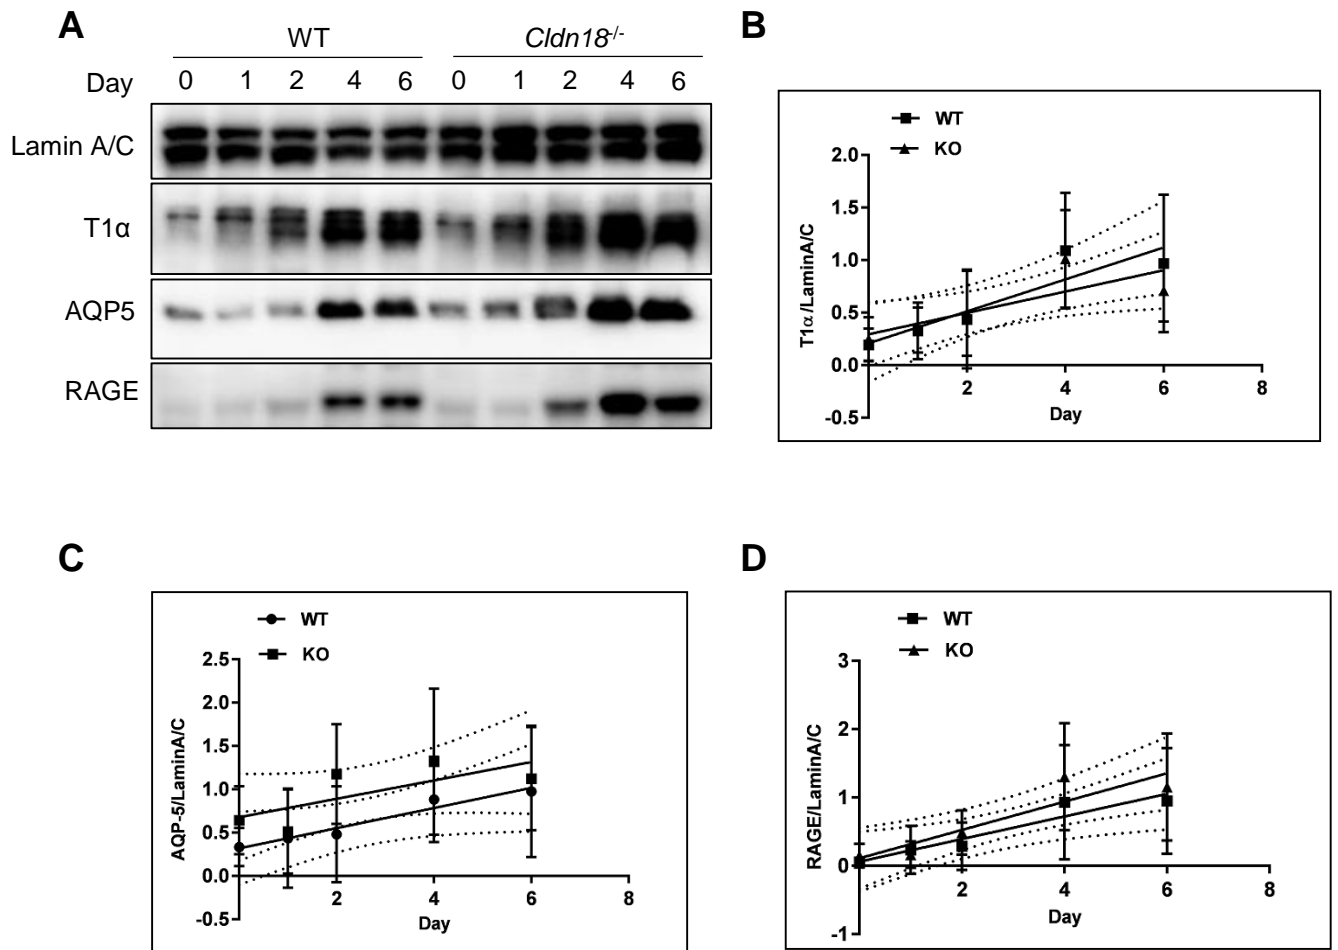

**Supplemental Figure 12. Type II (AT2) to type I (AT1) cell transdifferentiation is similar in *Cldn18*<sup>-/-</sup> and WT mice.** AT2 cells isolated from WT and *Cldn18*<sup>-/-</sup> mice were cultured on polycarbonate filters coated with laminin-5 for 6 days. Representative Western blot (**A**) shows a similar increase in AT1 cell markers T1α, AQP5 and RAGE during transdifferentiation from AT2 (Day 0) to AT1 cell-like phenotype (Day 6) in WT and *Cldn18*<sup>-/-</sup> KO AT2 cells. (**B-D**) Two-Way ANOVA and linear regression analyses yielded no significant difference ( $P>0.05$ ) of slopes for increase in AT1 cell markers over time between WT and *Cldn18* KO AT2 cell cultures.  $n=3$ .

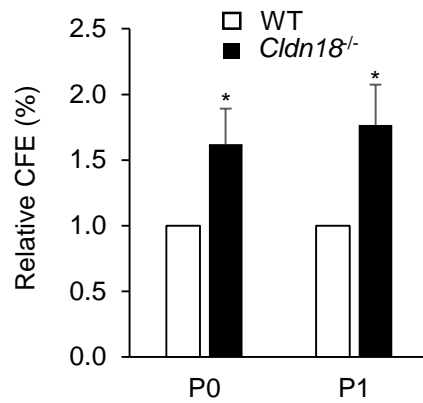

**Supplemental Figure 13. Colony forming efficiency (CFE) following passage (P) of WT and *Cldn18*<sup>-/-</sup> type II (AT2) cells.** CFE remains increased in *Cldn18*<sup>-/-</sup> compared to WT cells at P1. n=3. Z-test. \*, vs. WT mice,  $P < 0.05$ . Bar graphs represent mean  $\pm$  SEM.

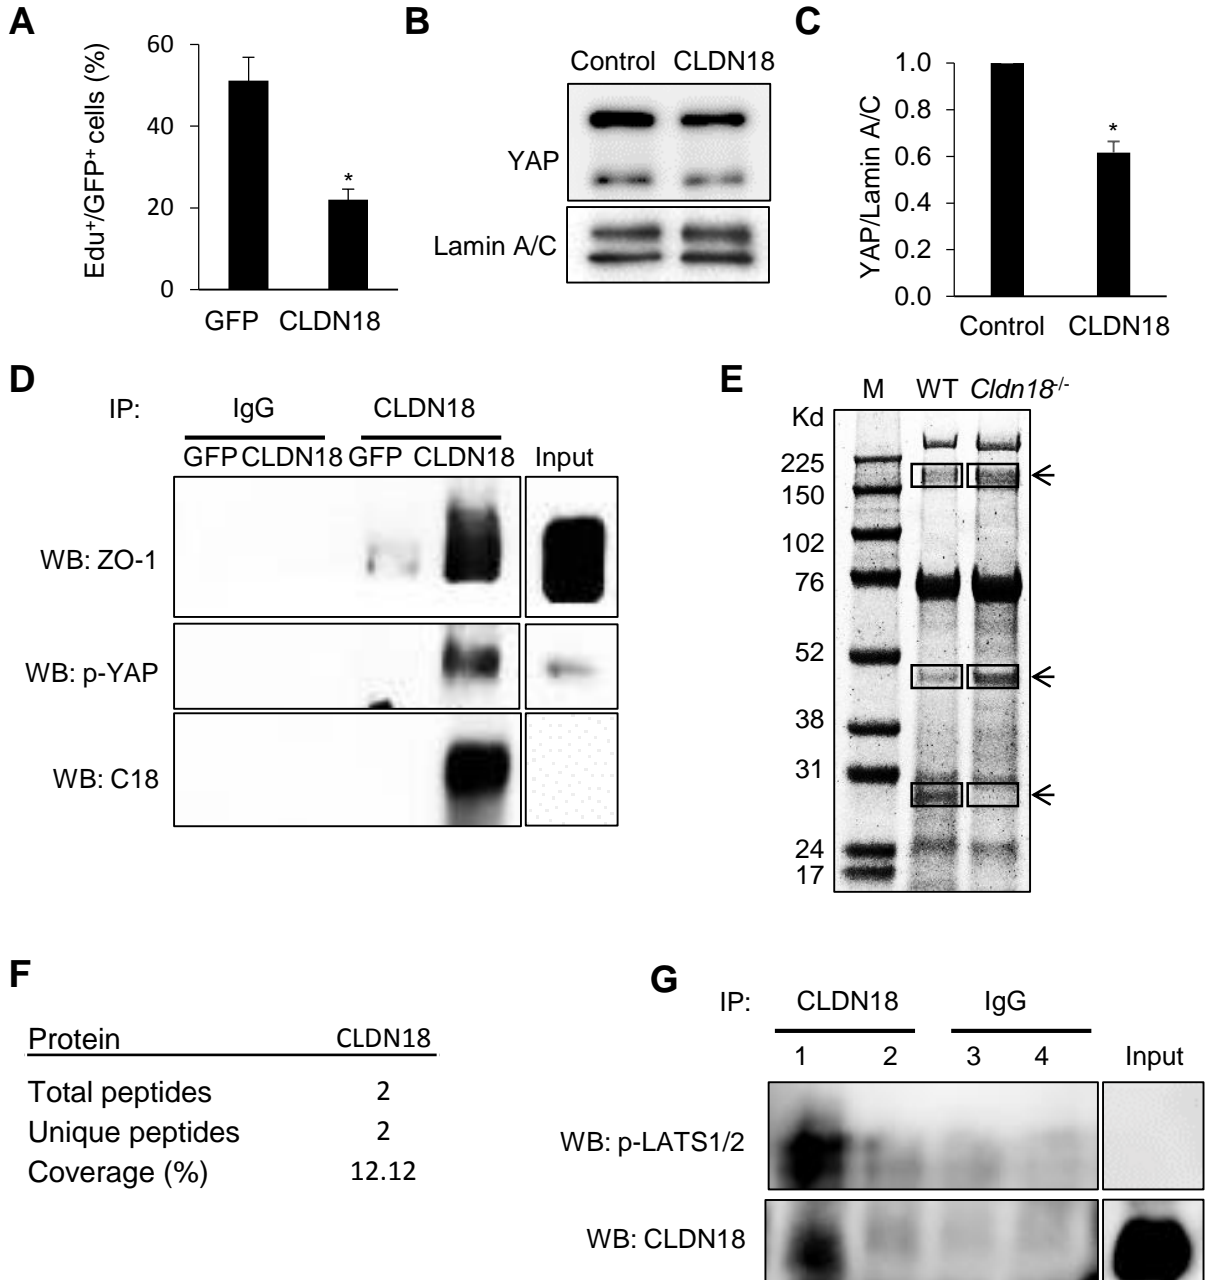

**Supplemental Figure 14. CLDN18 regulates cell proliferation and YAP activity and interacts with p-YAP, p-LATS1/2 and ZO-1.** CLDN18 overexpression in MLE-15 cells decreases proliferation (**A**) and nuclear YAP (**B** and **C**).  $n \geq 3$  independent experiments. Unpaired 2-sided *t*-test for **A**, Z-test for **C**. \*,  $P < 0.05$ . (**D**) Representative co-immunoprecipitation (co-IP) shows increased CLDN18 association with ZO-1 and p-YAP in MLE-15 cell membranes following CLDN18 overexpression. GFP is control vector. Input is cell lysate before IP as positive control; however, CLDN18 cannot be detected in input.  $n=3$ . (**E**) Lysates from WT and *Cldn18*<sup>-/-</sup> AT2 cells were immunoprecipitated with anti-YAP antibody. Eluates were resolved by SDS-PAGE and highlighted Coomassie blue-stained bands (rectangle, arrow) were analyzed by mass spectrometry. (**F**) Mass spectrometry identified CLDN18 as a YAP-interacting protein in WT but not *Cldn18*<sup>-/-</sup> lung. (**G**) IP of WT (1 and 3) and *Cldn18*<sup>-/-</sup> (2 and 4) AT2 cell membrane lysates with anti-CLDN18 antibody shows endogenous CLDN18 associates with p-LATS1/2. IgG = negative control. Input is lung tissue lysate before IP as positive control; however, p-LATS1/2 cannot be detected in input.  $n=2$ . In **D** and **G**, input were run on the same gel but were non-contiguous.

**A**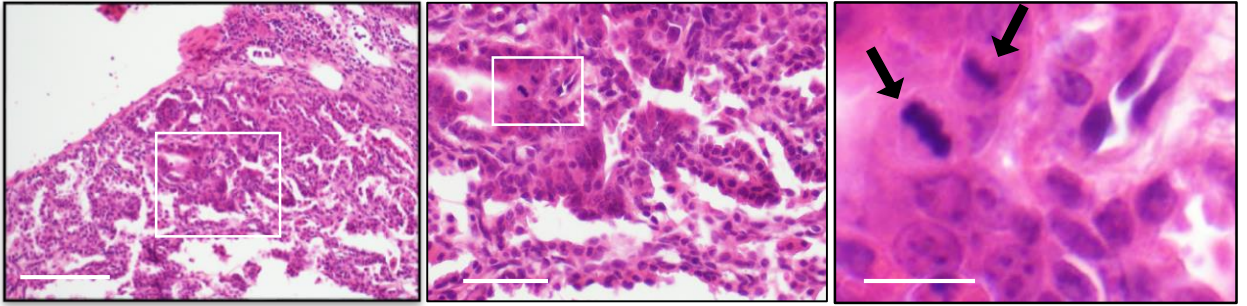**B**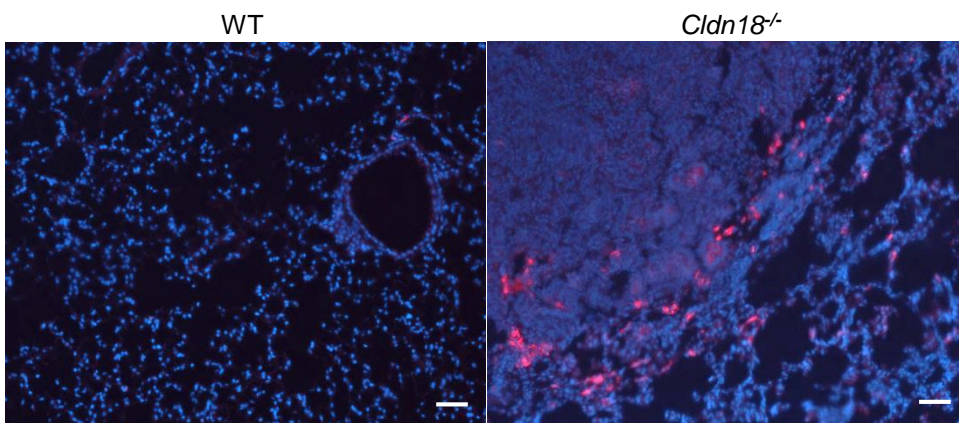

**Supplemental Figure 15. Lung tumors in *Cldn18*<sup>-/-</sup> mice.** (A) Hematoxylin and eosin staining shows mitotic figures (arrows) in lung tumor in *Cldn18*<sup>-/-</sup> mice. From left to right, bars = 400  $\mu$ m, 100  $\mu$ m and 40  $\mu$ m. (B) Immunofluorescence of lung tissue shows tumor infiltration with CD68<sup>+</sup> macrophages (red). DAPI (blue) is the nuclear counterstain. Scale bar: 50  $\mu$ m.



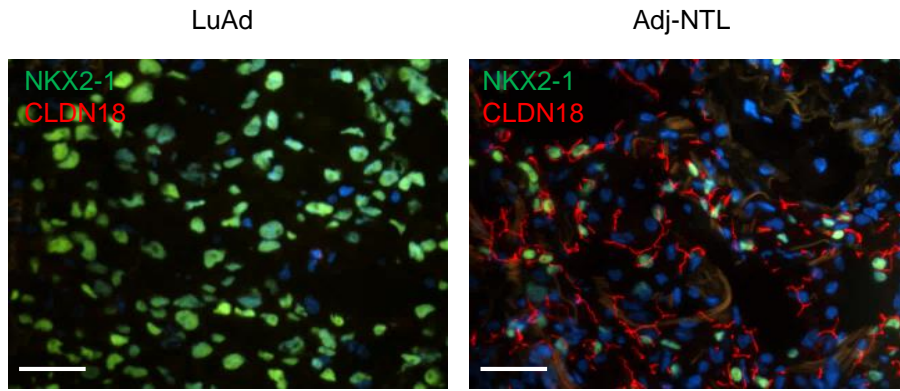

**Supplemental Figure 16. Double labeling for CLDN18 and NKX2-1 in lung tumors.** Immunofluorescence shows decreased CLDN18 protein expression in human LuAd compared to adjacent non-tumor lung (Adj-NTL). n=3. Scale bar: 50  $\mu$ m. DAPI is the nuclear counterstain.

**Supplemental Table 1. Summary of volume measurement of WT and *Cldn18*<sup>-/-</sup> lungs by micro-CT**

| Measurement                                                                     | WT1   | WT2   | WT3   | WT Average | <i>Cldn18</i> <sup>-/-</sup> 1 | <i>Cldn18</i> <sup>-/-</sup> 2 | <i>Cldn18</i> <sup>-/-</sup> 3 | <i>Cldn18</i> <sup>-/-</sup> Average |
|---------------------------------------------------------------------------------|-------|-------|-------|------------|--------------------------------|--------------------------------|--------------------------------|--------------------------------------|
| <b>Total lung (<math>V_{Tlung}</math>, cm<sup>3</sup>)</b>                      | 0.644 | 0.591 | 0.613 | 0.616      | 1.166                          | 1.022                          | 0.966                          | 1.051*                               |
| • <b>Conducting airway (<math>V_{Cairway}</math>, cm<sup>3</sup>)</b>           | 0.110 | 0.100 | 0.106 | 0.105      | 0.153                          | 0.125                          | 0.114                          | 0.131                                |
| • <b>Alveolar airspace (<math>V_{alv}</math>, cm<sup>3</sup>)</b>               | 0.424 | 0.393 | 0.397 | 0.404      | 0.362                          | 0.363                          | 0.370                          | 0.365                                |
| ❖ <b>Volume fraction of alveolar airspace in alveoli (<math>F_{alv}</math>)</b> | 0.790 | 0.790 | 0.780 | 0.790      | 0.360                          | 0.400                          | 0.430                          | 0.400                                |
| • <b>Parenchyma (<math>V_{par}</math>, cm<sup>3</sup>)</b>                      | 0.111 | 0.098 | 0.110 | 0.106      | 0.651                          | 0.534                          | 0.483                          | 0.556*                               |
| ❖ <b>Volume fraction of parenchyma in alveoli (<math>F_{par}</math>)</b>        | 0.210 | 0.210 | 0.220 | 0.210      | 0.640                          | 0.600                          | 0.570                          | 0.600                                |

n = 3. Unpaired 2-tailed t-test. \*,  $P < 0.05$  compared to WT.

**Supplemental Table 2. Tumor number and volume in aged *Cldn18<sup>-/-</sup>* mice**

| <b>Mice</b>                   | <b>Tumor number</b> | <b>Tumor volume (V, mm<sup>3</sup>)</b> |
|-------------------------------|---------------------|-----------------------------------------|
| <b>Cldn18<sup>-/-</sup> 1</b> | 3                   | 1.21                                    |
|                               |                     | 0.61                                    |
|                               |                     | 0.35                                    |
| <b>Cldn18<sup>-/-</sup> 2</b> | 2                   | 29.6                                    |
|                               |                     | 9.34                                    |
| <b>Cldn18<sup>-/-</sup> 3</b> | 4                   | 6.48                                    |
|                               |                     | 2.4                                     |
|                               |                     | 2.1                                     |
|                               |                     | 2                                       |
| <b>WT1</b>                    | 0                   | —                                       |
| <b>WT2</b>                    | 0                   | —                                       |
| <b>WT3</b>                    | 0                   | —                                       |

Full unedited gels for **Figures and Supplemental Figures**

# Full unedited gels for Figure 3

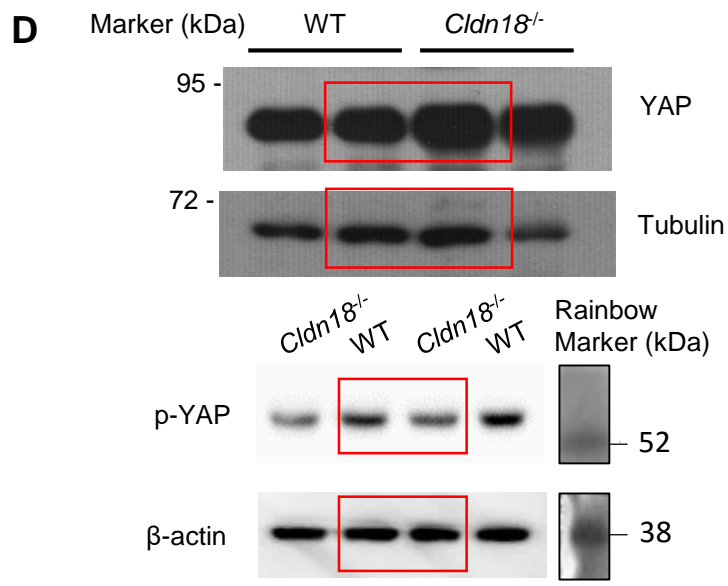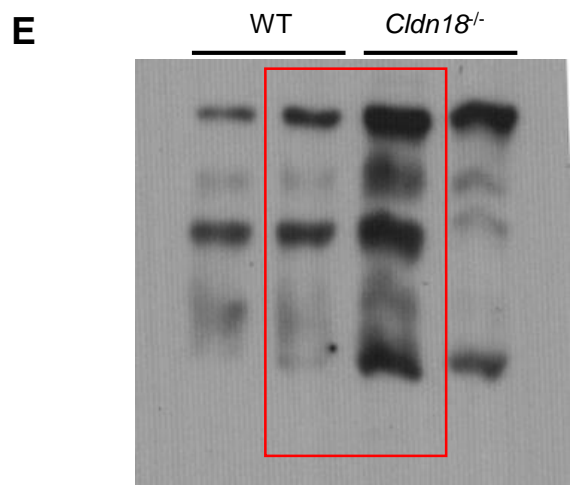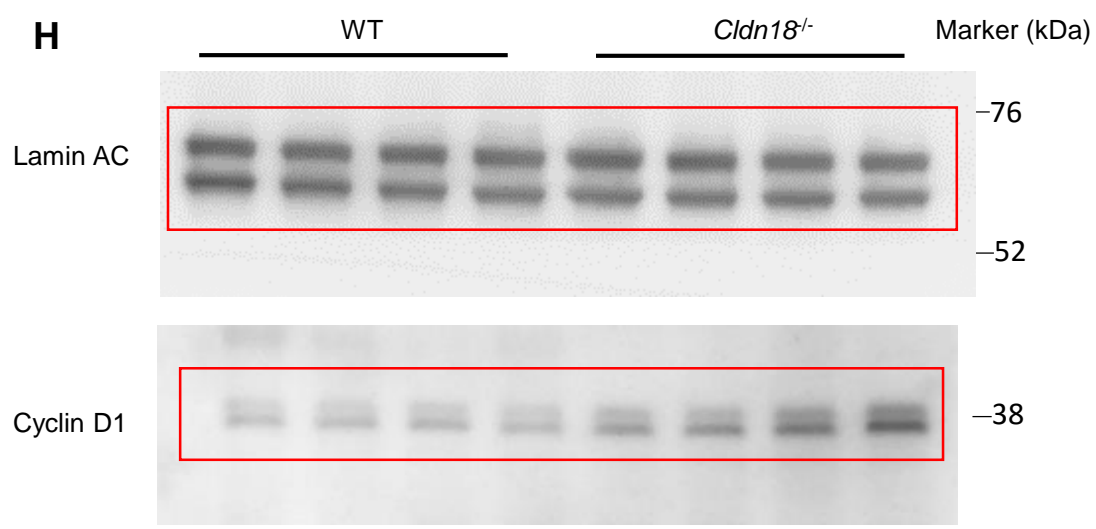

# Full unedited gels for **Figure 5**

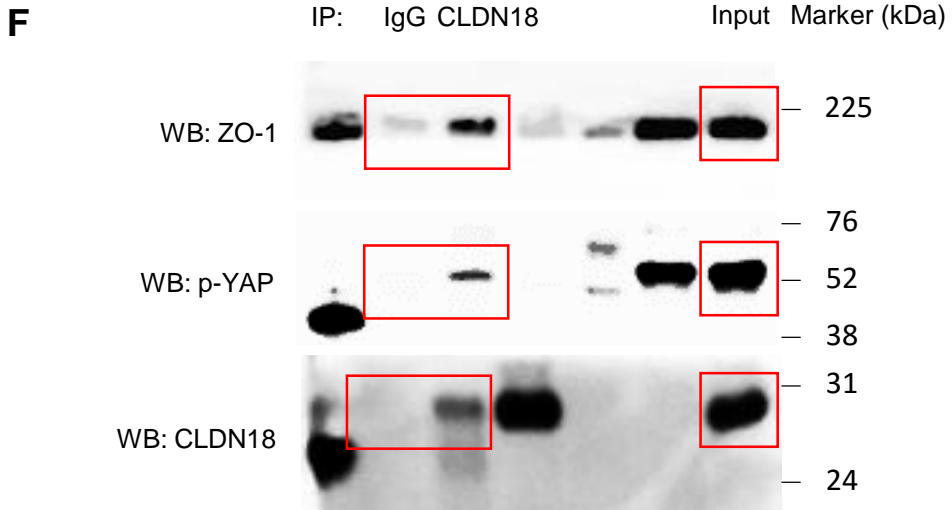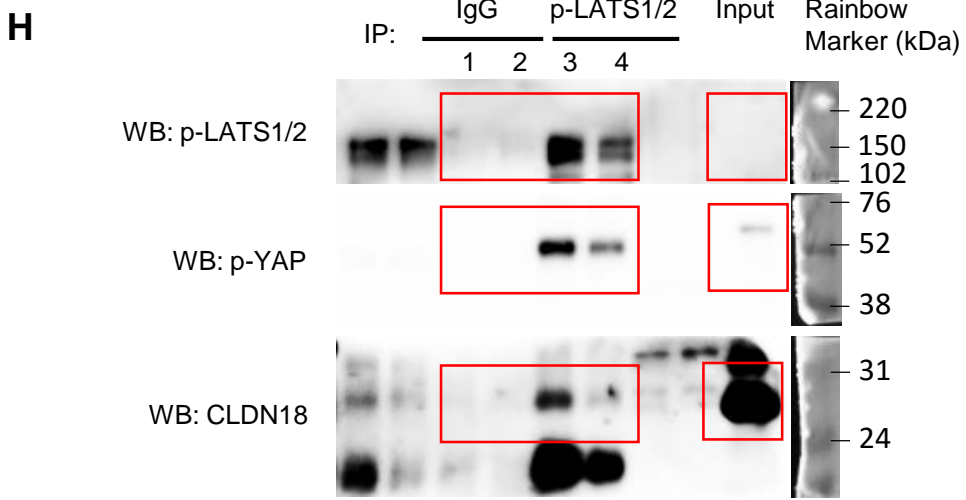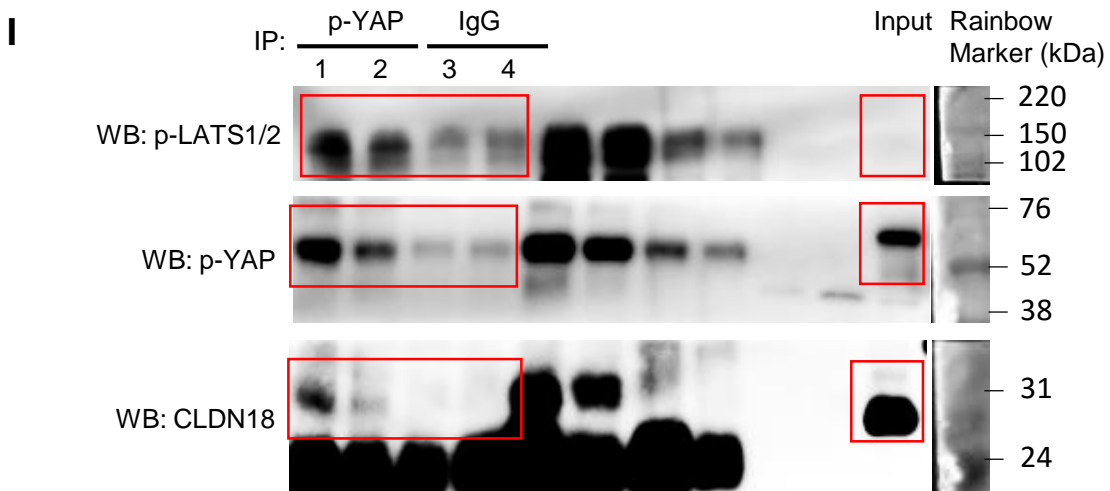

# Full unedited gels for **Supplemental Figure 3**

**A**

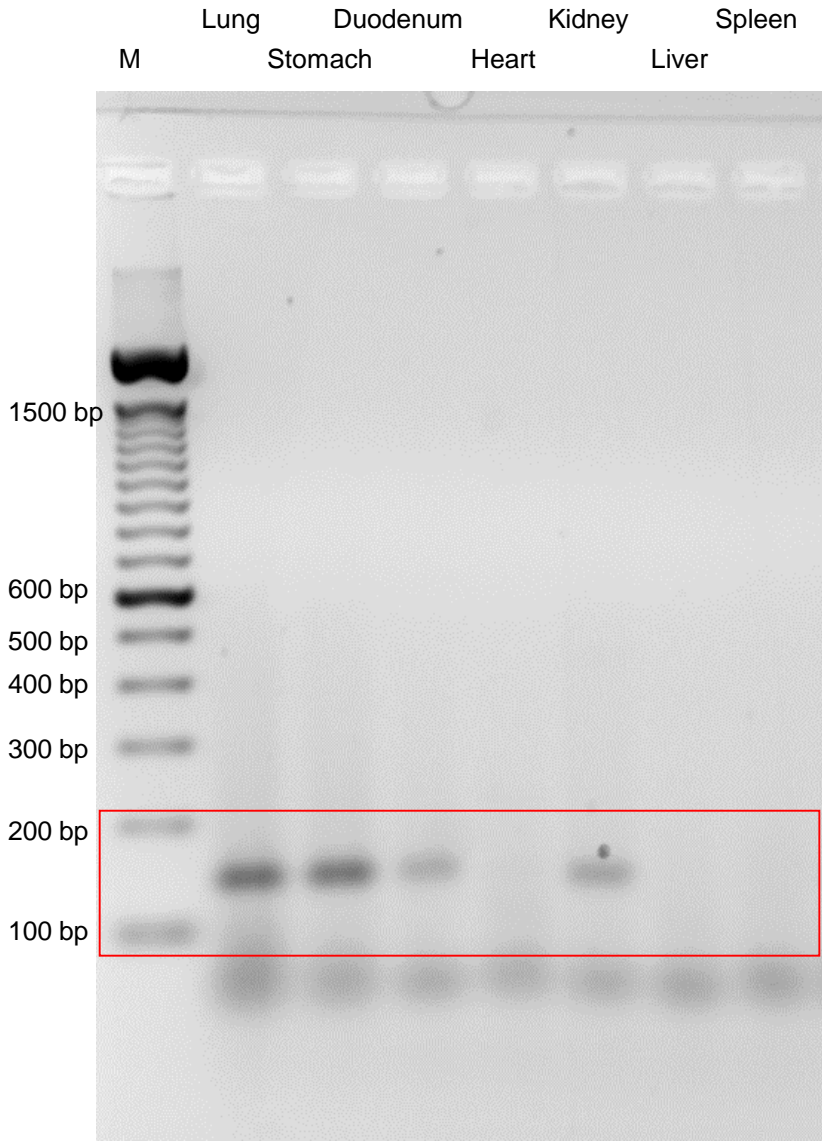



**D**

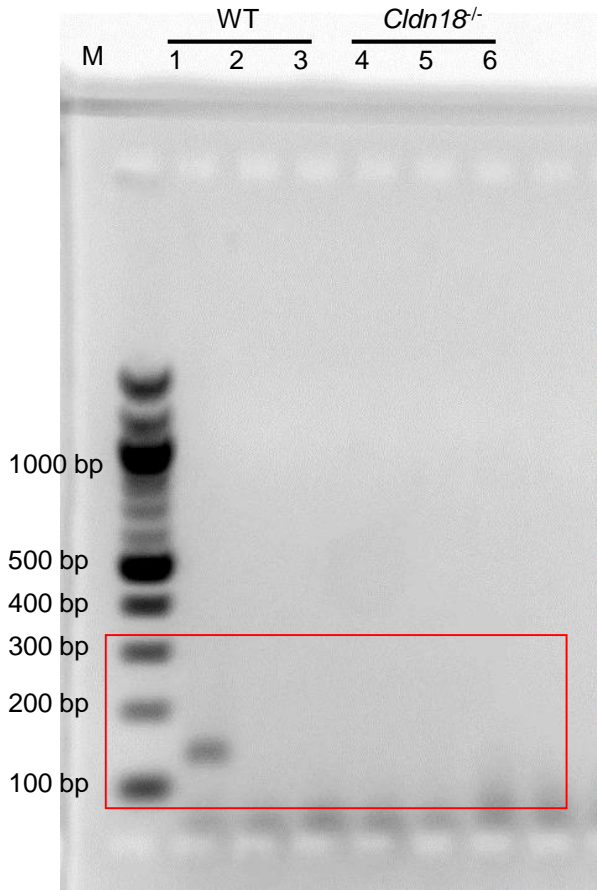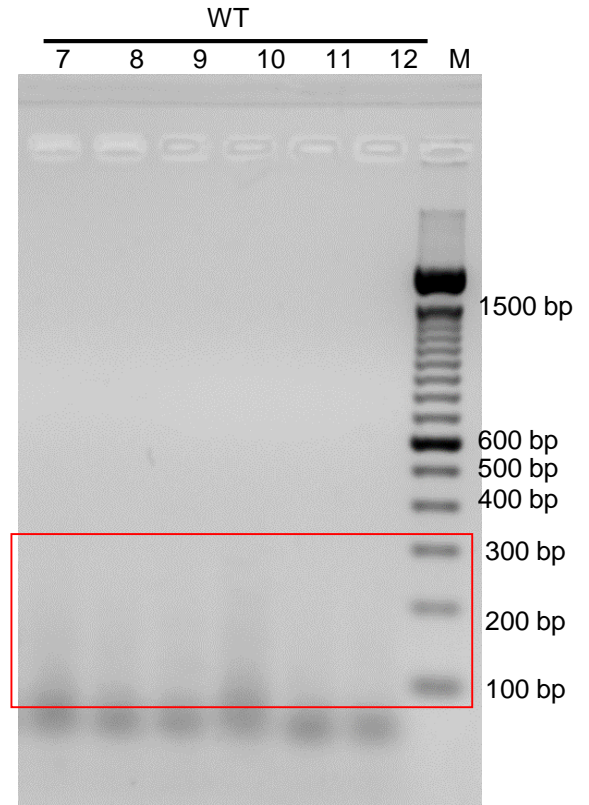

# Full unedited gels for Supplemental Figure 6

**A**

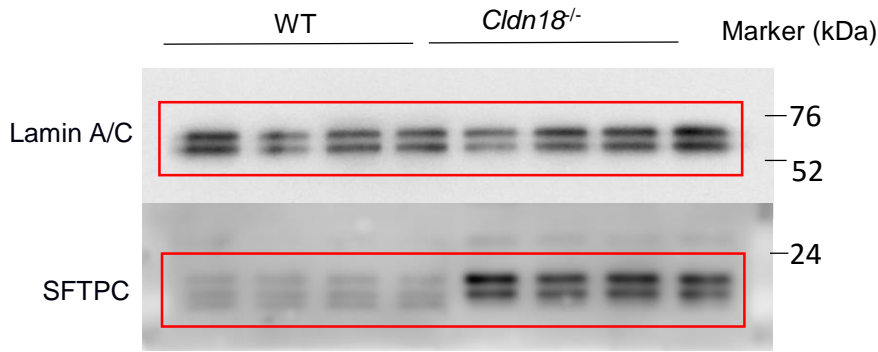

**C**

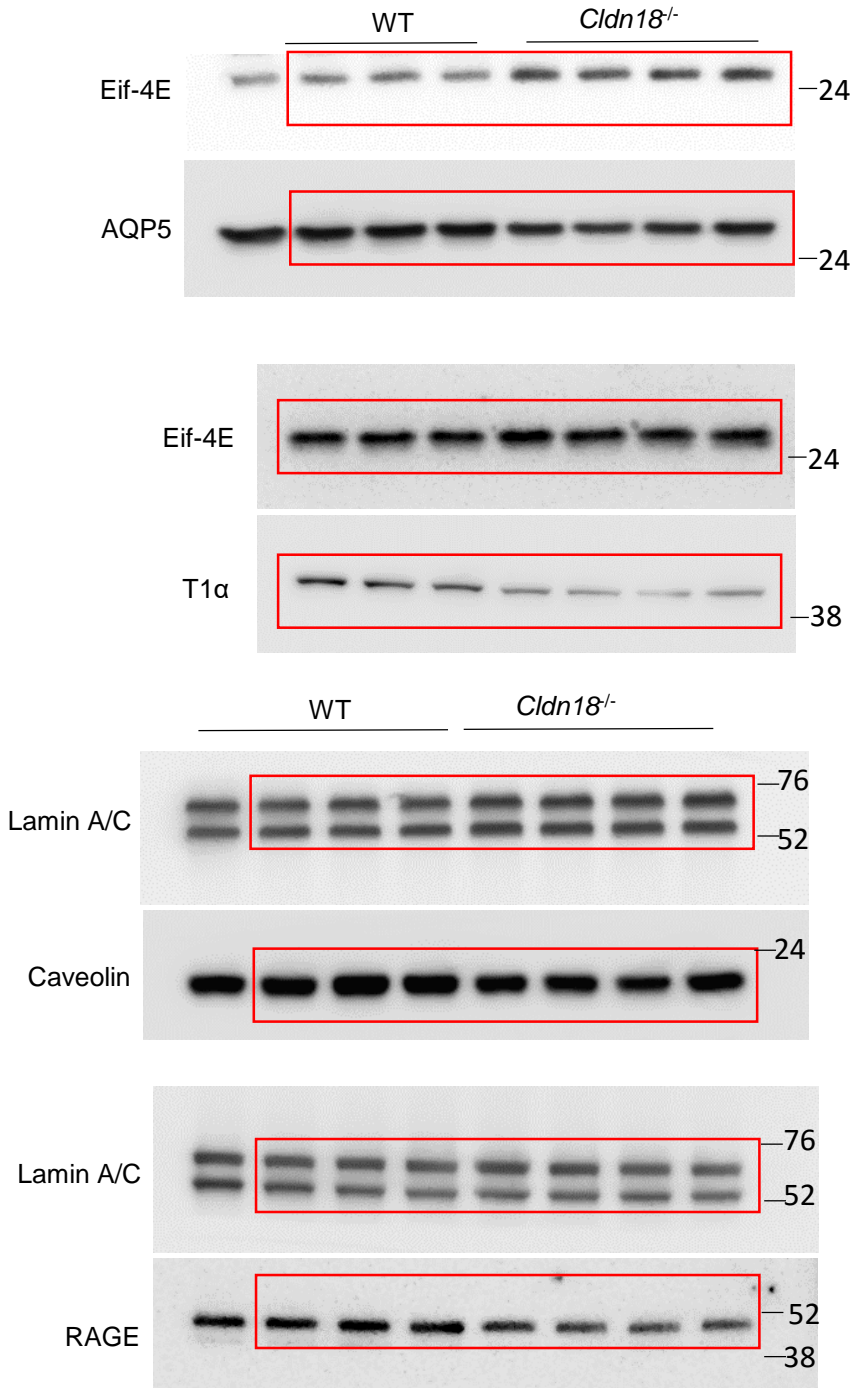

# Full unedited gels for **Supplemental Figure 12**

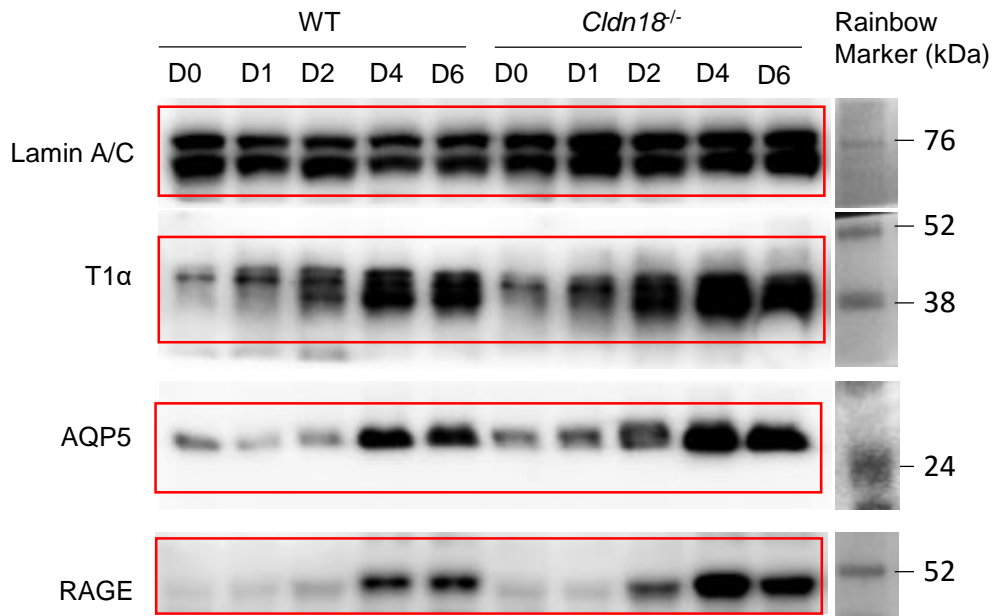

# Full unedited gels for Supplemental Figure 14

**B** Control CLDN18 Marker (kDa)

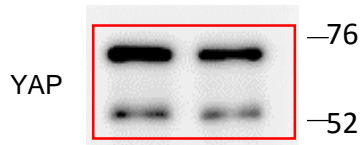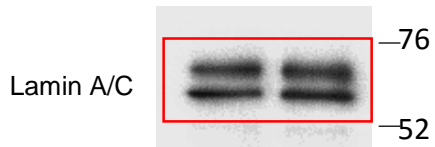

**D** IP: IgG CLDN18 Input Marker (kDa)  
GFP CLDN18 GFP CLDN18

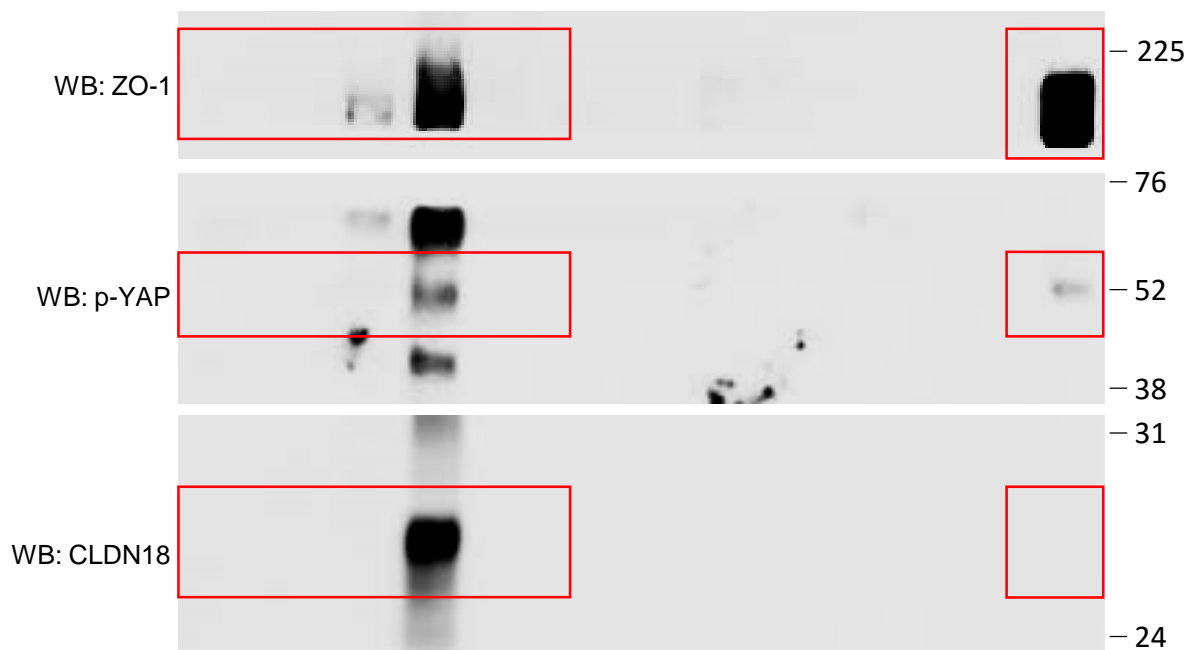

**E**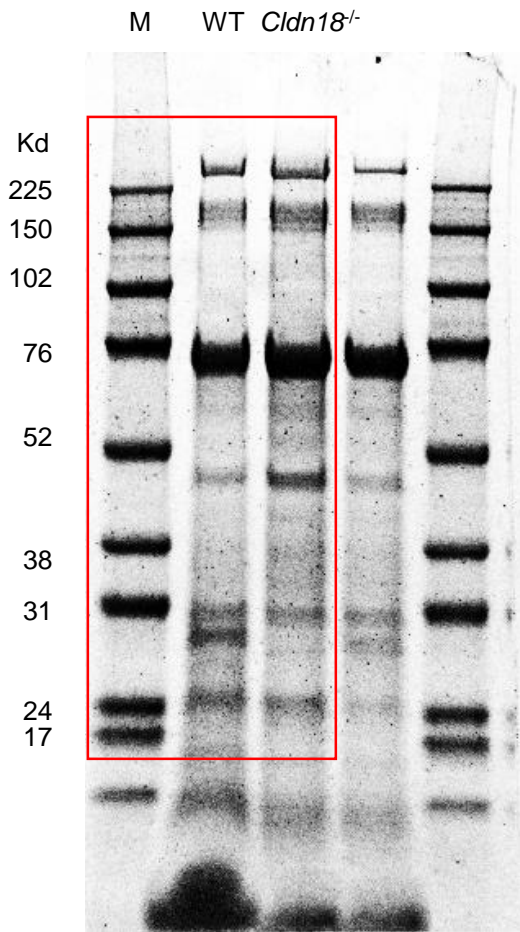**G**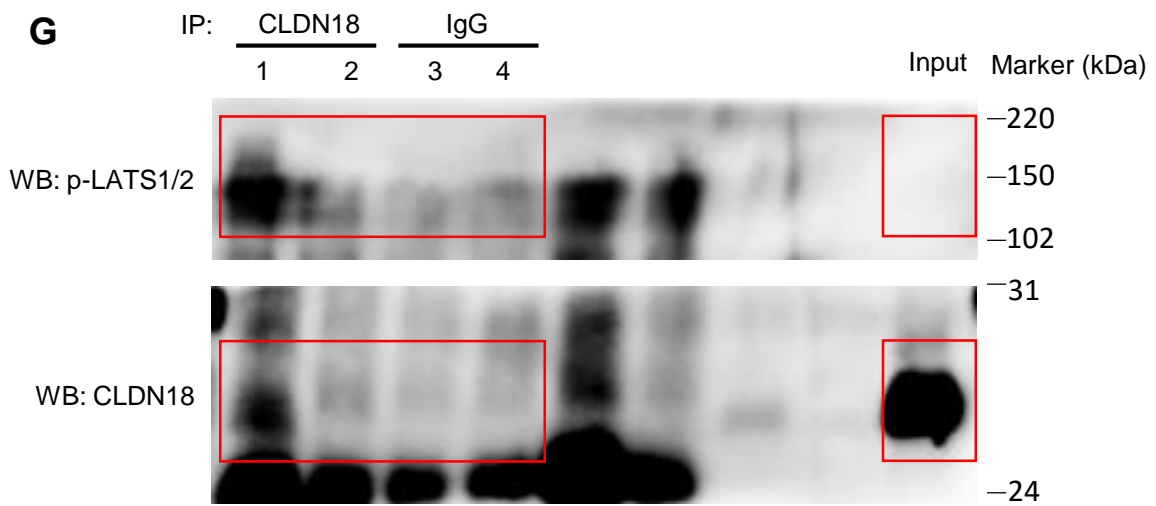

Supplement: sd1 [file 1]
